# Supplementary material for: Trends in Telehealth Antibiotic Prescribing for Children Through the COVID-19 Pandemic
Source: Oxford University Press journal article supplement (doi:10.1542/peds.2022-056209), 2022-06-29
Supplement: peds_2022056209supplementarydata.pdf [file peds_2022056209supplementarydata.pdf]

## Supplemental Information

**SUPPLEMENTAL TABLE 3** First 3 Digits of ICD-10 Code Linked to an Antibiotic Order and Corresponding Diagnosis Grouping Developed by Authors

| First 3 Digits of ICD-10 Code | Diagnosis Grouping                           |
|-------------------------------|----------------------------------------------|
| H66                           | Diseases of the ear and mastoid process      |
| H65                           | Diseases of the ear and mastoid process      |
| H92                           | Diseases of the ear and mastoid process      |
| H60                           | Diseases of the ear and mastoid process      |
| H67                           | Diseases of the ear and mastoid process      |
| H70                           | Diseases of the ear and mastoid process      |
| J02                           | Diseases of the respiratory system           |
| J18                           | Diseases of the respiratory system           |
| J01                           | Diseases of the respiratory system           |
| J03                           | Diseases of the respiratory system           |
| J36                           | Diseases of the respiratory system           |
| J13                           | Diseases of the respiratory system           |
| J22                           | Diseases of the respiratory system           |
| J15                           | Diseases of the respiratory system           |
| J06                           | Diseases of the respiratory system           |
| J20                           | Diseases of the respiratory system           |
| J00                           | Diseases of the respiratory system           |
| J21                           | Diseases of the respiratory system           |
| J05                           | Diseases of the respiratory system           |
| J86                           | Diseases of the respiratory system           |
| J04                           | Diseases of the respiratory system           |
| J16                           | Diseases of the respiratory system           |
| L70                           | Diseases of the skin and subcutaneous tissue |
| L01                           | Diseases of the skin and subcutaneous tissue |
| L08                           | Diseases of the skin and subcutaneous tissue |
| L03                           | Diseases of the skin and subcutaneous tissue |
| L02                           | Diseases of the skin and subcutaneous tissue |
| L73                           | Diseases of the skin and subcutaneous tissue |
| L05                           | Diseases of the skin and subcutaneous tissue |
| L04                           | Diseases of the skin and subcutaneous tissue |
| L71                           | Diseases of the skin and subcutaneous tissue |
| L72                           | Diseases of the skin and subcutaneous tissue |
| L20                           | Diseases of the skin and subcutaneous tissue |
| L25                           | Diseases of the skin and subcutaneous tissue |
| L24                           | Diseases of the skin and subcutaneous tissue |
| N30                           | Diseases of the genitourinary system         |
| N39                           | Diseases of the genitourinary system         |
| N48                           | Diseases of the genitourinary system         |
| N76                           | Diseases of the genitourinary system         |
| N61                           | Diseases of the genitourinary system         |
| N45                           | Diseases of the genitourinary system         |
| N47                           | Diseases of the genitourinary system         |
| N34                           | Diseases of the genitourinary system         |
| N73                           | Diseases of the genitourinary system         |
| N75                           | Diseases of the genitourinary system         |
| N50                           | Diseases of the genitourinary system         |
| N49                           | Diseases of the genitourinary system         |
| N72                           | Diseases of the genitourinary system         |
| A69                           | Lyme Disease                                 |
| W57                           | Lyme Disease                                 |
| R21                           | Lyme Disease                                 |
| S00                           | Lyme Disease                                 |
| S30                           | Lyme Disease                                 |
| S10                           | Lyme Disease                                 |
| S20                           | Lyme Disease                                 |
| S40                           | Lyme Disease                                 |
| S80                           | Lyme Disease                                 |
| B88                           | Lyme Disease                                 |

**SUPPLEMENTAL TABLE 3** Continued

| First 3 Digits of ICD-10 Code | Diagnosis Grouping |
|-------------------------------|--------------------|
| S50                           | Lyme Disease       |
| R76                           | Lyme Disease       |
| S90                           | Lyme Disease       |
| S70                           | Lyme Disease       |
